# Supplementary material for: Prevalence, Phenotypes, and Comorbidities of Polycystic Ovary Syndrome Among Indian Women
Source: PubMed Central journal article supplement (PMC11581580; doi:10.1001/jamanetworkopen.2024.40583), 2024-10-23
Supplement: jamanetwopen-e2440583-s001.pdf [file jamanetwopen-e2440583-s001.pdf]

Supplemental Online Content: Nonauthor Collaborators\*First name, last name, and suffix (if applicable) are required and will appear in PubMed.

| <b>*Group Name(s): PCOS Study Group</b>  |                   |                              |                         |                     |                                                 |                                                                |                                                                                                   |
|------------------------------------------|-------------------|------------------------------|-------------------------|---------------------|-------------------------------------------------|----------------------------------------------------------------|---------------------------------------------------------------------------------------------------|
| <b>*First Name and Middle Initial(s)</b> | <b>*Last Name</b> | <b>*Suffix (eg, Jr, III)</b> | <b>Academic Degrees</b> | <b>Institution</b>  | <b>Location (city, state/province, country)</b> | <b>Role or Contribution, eg, chair, principal investigator</b> | <b>Group (if more than 1 Group listed in the byline) and/or Subgroup (eg, Steering Committee)</b> |
| Parvaiz                                  | Koul              | Dr                           |                         | SKIMS Srinagar      | SRINAGAR                                        | Co-Investigators                                               |                                                                                                   |
| Zafar Amin                               | Shah              | Dr                           |                         | SKIMS Srinagar      | SRINAGAR                                        | Co-Investigators                                               |                                                                                                   |
| Shariq                                   | Masoodi           | Dr                           |                         | SKIMS Srinagar      | SRINAGAR                                        | Co-Investigators                                               |                                                                                                   |
| Tabasuum                                 | Parvez            | Dr                           |                         | SKIMS Srinagar      | SRINAGAR                                        | Co-Investigators                                               |                                                                                                   |
| Ghulam Nabi                              | Yatoo             | Dr                           |                         | SKIMS Srinagar      | SRINAGAR                                        | Co-Investigators                                               |                                                                                                   |
| Naseer Ahmad                             | Chow              | Dr                           |                         | SKIMS Srinagar      | SRINAGAR                                        | Co-Investigators                                               |                                                                                                   |
| Tariq                                    | Gojwari           | Dr                           |                         | SKIMS Srinagar      | SRINAGAR                                        | Co-Investigators                                               |                                                                                                   |
| Muzaffar                                 | Wani              | Dr                           |                         | SKIMS Srinagar      | SRINAGAR                                        | Co-Investigators                                               |                                                                                                   |
| Seema                                    | Qayoom            | Dr                           |                         | SKIMS Srinagar      | SRINAGAR                                        | Co-Investigators                                               |                                                                                                   |
| Wahid                                    | Khan              | Dr                           |                         | SKIMS Srinagar      | SRINAGAR                                        | Co-Investigators                                               |                                                                                                   |
| Rama                                     | Walia             | Dr                           |                         | PGIMER Chandigarh   | CHANDIGARH                                      | Co-Investigators                                               |                                                                                                   |
| Deepenkar                                | De                | Dr                           |                         | PGIMER Chandigarh   | CHANDIGARH                                      | Co-Investigators                                               |                                                                                                   |
| Aashima                                  | Arora             | Dr                           |                         | PGIMER Chandigarh   | CHANDIGARH                                      | Co-Investigators                                               |                                                                                                   |
| Tulika                                   | Singh             | Dr                           |                         | PGIMER Chandigarh   | CHANDIGARH                                      | Co-Investigators                                               |                                                                                                   |
| Neena                                    | Khanna            | Dr                           |                         | AIIMS New Delhi     | NEWDELHI                                        | Co-Investigators                                               |                                                                                                   |
| Nitish                                   | Naik              | Dr                           |                         | AIIMS New Delhi     | NEWDELHI                                        | Co-Investigators                                               |                                                                                                   |
| Shyam                                    | Prakash           | Dr                           |                         | AIIMS New Delhi     | NEWDELHI                                        | Co-Investigators                                               |                                                                                                   |
| Nandita                                  | Gupta             | Dr                           |                         | AIIMS New Delhi     | NEWDELHI                                        | Co-Investigators                                               |                                                                                                   |
| Rajesh                                   | Sagar             | Dr                           |                         | AIIMS New Delhi     | NEWDELHI                                        | Co-Investigators                                               |                                                                                                   |
| Jai Bhagwan                              | Sharma            | Dr                           |                         | AIIMS New Delhi     | NEWDELHI                                        | Co-Investigators                                               |                                                                                                   |
| Devasenathipathy                         | Kandasamy         | Dr                           |                         | AIIMS New Delhi     | NEWDELHI                                        | Co-Investigators                                               |                                                                                                   |
| Narender Kuber                           | Bodhey            | Dr                           |                         | AIIMS Raipur        | RAIPUR                                          | Co-Investigators                                               |                                                                                                   |
| Eli                                      | Mohapatra         | Dr                           |                         | AIIMS Raipur        | RAIPUR                                          | Co-Investigators                                               |                                                                                                   |
| Sabah                                    | Siddiqui          | Dr                           |                         | AIIMS Raipur        | RAIPUR                                          | Co-Investigators                                               |                                                                                                   |
| Gourisankar                              | Kamilya           | Dr                           |                         | IPGMER Kolkata      | KOLKATA                                         | Co-Investigators                                               |                                                                                                   |
| Archana                                  | Singh             | Dr                           |                         | IPGMER Kolkata      | KOLKATA                                         | Co-Investigators                                               |                                                                                                   |
| Pradip                                   | Mukhopadhyay      | Dr                           |                         | IPGMER Kolkata      | KOLKATA                                         | Co-Investigators                                               |                                                                                                   |
| Nehar Ranjan                             | Sarkar            | Dr                           |                         | IPGMER Kolkata      | KOLKATA                                         | Co-Investigators                                               |                                                                                                   |
| Alice Abraham                            | Ruram             | Dr                           |                         | NEIGRIHMS, Shillong | SHILLONG                                        | Co-Investigators                                               |                                                                                                   |
| Jessy                                    | Abraham           | Dr                           |                         | NEIGRIHMS, Shillong | SHILLONG                                        | Co-Investigators                                               |                                                                                                   |
| Donboklang                               | Lynser            | Dr                           |                         | NEIGRIHMS, Shillong | SHILLONG                                        | Co-Investigators                                               |                                                                                                   |
| Manika                                   | Agrawal           | Dr                           |                         | NEIGRIHMS, Shillong | SHILLONG                                        | Co-Investigators                                               |                                                                                                   |
| Laksman                                  | Rao               | Dr                           |                         | OMC Hyderabad       | HYDERABAD                                       | Co-Investigators                                               |                                                                                                   |
| Sudha                                    | Bindu             | Dr                           |                         | OMC Hyderabad       | HYDERABAD                                       | Co-Investigators                                               |                                                                                                   |

Supplemental Online Content: Nonauthor Collaborators\*First name, last name, and suffix (if applicable) are required and will appear in PubMed.

| *First Name and Middle Initial(s) | *Last Name | *Suffix (eg, Jr, III) | Academic Degrees | Institution     | Location (city, state/province, country) | Role or Contribution, eg, chair, principal investigator | Group (if more than 1 Group listed in the byline) and/or Subgroup (eg, Steering Committee) |
|-----------------------------------|------------|-----------------------|------------------|-----------------|------------------------------------------|---------------------------------------------------------|--------------------------------------------------------------------------------------------|
| Malathi                           | Ponnuru    | Dr                    |                  | OMC Hyderabad   | HYDERABAD                                | Co-Investigators                                        |                                                                                            |
| Nadeem                            | Ahmad      | Dr                    |                  | OMC Hyderabad   | HYDERABAD                                | Co-Investigators                                        |                                                                                            |
| Sujatha                           | Rani       | Dr                    |                  | OMC Hyderabad   | HYDERABAD                                | Co-Investigators                                        |                                                                                            |
| Aleem Ahmad                       | Khan       | Dr                    |                  | MHRT Hyderabad  | HYDERABAD                                | Co-Investigators                                        |                                                                                            |
| Sultan Rizwan                     | Ahmad      | Dr                    |                  | MHRT Hyderabad  | HYDERABAD                                | Co-Investigators                                        |                                                                                            |
| Prabhakar                         | Rao        | Dr                    |                  | MHRT Hyderabad  | HYDERABAD                                | Co-Investigators                                        |                                                                                            |
| Nirmala                           | C          | Dr                    |                  | MHRT Hyderabad  | HYDERABAD                                | Co-Investigators                                        |                                                                                            |
| Anuja Elizabeth                   | George     | Dr                    |                  | GMC Trivandrum  | TRIVANDRUM                               | Co-Investigators                                        |                                                                                            |
| Jayasree                          | Leelamma   | Dr                    |                  | GMC Trivandrum  | TRIVANDRUM                               | Co-Investigators                                        |                                                                                            |
| Jayakumari                        |            | Dr                    |                  | GMC Trivandrum  | TRIVANDRUM                               | Co-Investigators                                        |                                                                                            |
| Gaurav                            | Thakur     | Dr                    |                  | ICMR New Delhi  | NEW DELHI                                | Research staff                                          |                                                                                            |
| Saba                              | Noor       | Dr                    |                  | ICMR New Delhi  | NEW DELHI                                | Research staff                                          |                                                                                            |
| Khursheed                         | Paddar     | Dr                    |                  | SKIMS Srinagar  | SRINAGAR                                 | Research staff                                          |                                                                                            |
| Gaivee Vinam                      | Meshram    | Dr                    |                  | AIIMS Raipur    | RAIPUR                                   | Junior Medical officer                                  |                                                                                            |
| Shouvik                           | Choudhary  | Dr                    |                  | IPGMER Kolkata  | KOLKATA                                  | Junior Medical officer                                  |                                                                                            |
| Aafia                             | Rashid     | Dr                    |                  | SKIMS Srinagar  | SRINAGAR                                 | Research staff                                          |                                                                                            |
| Wasia                             | Showkat    | Dr                    |                  | SKIMS Srinagar  | SRINAGAR                                 | Research staff                                          |                                                                                            |
| Rohina                            | Bashir     | Dr                    |                  | SKIMS Srinagar  | SRINAGAR                                 | Research staff                                          |                                                                                            |
| Rabiya                            | Rashid     | Dr                    |                  | SKIMS Srinagar  | SRINAGAR                                 | Research staff                                          |                                                                                            |
| Jabish                            | Manzoor    |                       |                  | SKIMS Srinagar  | SRINAGAR                                 | Research staff                                          |                                                                                            |
| Nisar                             | Ahmad      |                       |                  | SKIMS Srinagar  | SRINAGAR                                 | Research staff                                          |                                                                                            |
| Pieu                              | Adhikary   |                       |                  | IPGMER Kolkata  | KOLKATA                                  | Research staff                                          |                                                                                            |
| Subhasish                         | Pramanik   |                       |                  | IPGMER Kolkata  | KOLKATA                                  | Research staff                                          |                                                                                            |
| Rahul                             | Harish     | Dr                    |                  | IPGMER Kolkata  | KOLKATA                                  | Junior Medical officer                                  |                                                                                            |
| Mudasir                           | Makhdoomi  | Dr                    |                  | SKIMS Srinagar  | SRINAGAR                                 | Research staff                                          |                                                                                            |
| Mudasir                           | Fayaz      |                       |                  | SKIMS Srinagar  | SRINAGAR                                 | Research staff                                          |                                                                                            |
| Nafeez                            | Rehman     |                       |                  | SKIMS Srinagar  | SRINAGAR                                 | Research staff                                          |                                                                                            |
| Neha                              | Ravi       |                       |                  | AIIMS New Delhi | NEWDELHI                                 | Research staff                                          |                                                                                            |
| Ajay                              | Kumar      |                       |                  | AIIMS New Delhi | NEWDELHI                                 | Research staff                                          |                                                                                            |
| Siffali                           | Chandrakar |                       |                  | AIIMS Raipur    | RAIPUR                                   | Research staff                                          |                                                                                            |
| Nithlesh                          | Kumar      |                       |                  | AIIMS Raipur    | RAIPUR                                   | Research staff                                          |                                                                                            |
| Sudipta                           | Banerjee   |                       |                  | AIIMS Raipur    | RAIPUR                                   | Research staff                                          |                                                                                            |

Supplemental Online Content: Nonauthor Collaborators\*First name, last name, and suffix (if applicable) are required and will appear in PubMed.

| *First Name and Middle Initial(s) | *Last Name | *Suffix (eg, Jr, III) | Academic Degrees | Institution       | Location (city, state/province, country) | Role or Contribution, eg, chair, principal investigator | Group (if more than 1 Group listed in the byline) and/or Subgroup (eg, Steering Committee) |
|-----------------------------------|------------|-----------------------|------------------|-------------------|------------------------------------------|---------------------------------------------------------|--------------------------------------------------------------------------------------------|
| Humaira                           | Minhaj     | Dr                    |                  | MHRT Hyderabad    | HYDERABAD                                | Research staff                                          |                                                                                            |
| Balaji                            | Bhaskar    | Dr                    |                  | MHRT Hyderabad    | HYDERABAD                                | Research staff                                          |                                                                                            |
| Shaik                             | Iqbal      |                       |                  | MHRT Hyderabad    | HYDERABAD                                | Research staff                                          |                                                                                            |
| Ram                               | Babu       |                       |                  | MHRT Hyderabad    | HYDERABAD                                | Research staff                                          |                                                                                            |
| Arya                              | Suresh     |                       |                  | GMC Trivandrum    | TRIVANDRUM                               | Research staff                                          |                                                                                            |
| RS                                | Sharma     | Dr                    |                  | ICMR New Delhi    | NEWDELHI                                 | supporting team                                         |                                                                                            |
| Shalini                           | Singh      | Dr                    |                  | ICMR New Delhi    | NEWDELHI                                 | supporting team                                         |                                                                                            |
| Malabika                          | Roy        | Dr                    |                  | ICMR New Delhi    | NEWDELHI                                 | supporting team                                         |                                                                                            |
| Reeta                             | Rasily     | Dr                    |                  | ICMR New Delhi    | NEWDELHI                                 | supporting team                                         |                                                                                            |
| Nomita                            | Chandiok   | Dr                    |                  | ICMR New Delhi    | NEWDELHI                                 | Junior Medical officer                                  |                                                                                            |
| Mehnaaz                           | Rajab      | Dr                    |                  | SKIMS Srinagar    | SRINAGAR                                 | Junior Medical officer                                  |                                                                                            |
| Arifa                             | Reshi      | Dr                    |                  | SKIMS Srinagar    | SRINAGAR                                 | Research staff                                          |                                                                                            |
| Deeba                             | Farhat     | Dr                    |                  | SKIMS Srinagar    | SRINAGAR                                 | Research staff                                          |                                                                                            |
| Abid                              | Rashid     |                       |                  | SKIMS Srinagar    | SRINAGAR                                 | Research staff                                          |                                                                                            |
| Nusrat                            | Jahan      |                       |                  | SKIMS Srinagar    | SRINAGAR                                 | Research staff                                          |                                                                                            |
| Shavini                           | Choudhary  |                       |                  | PGIMER Chandigarh | CHANDIGARH                               | Research staff                                          |                                                                                            |
| Naila                             | Mohiudin   | Dr                    |                  | MHRT Hyderabad    | HYDERABAD                                | Research staff                                          |                                                                                            |
| Samala                            | Ranjith    |                       |                  | OMC Hyderabad     | HYDERABAD                                | Research staff                                          |                                                                                            |
| Khalid ul Islam                   | Rather     | Dr                    |                  | SKIMS Srinagar    | SRINAGAR                                 | stastistical Assistant                                  |                                                                                            |
