# Supplementary material for: Prevalence, Phenotypes, and Comorbidities of Polycystic Ovary Syndrome Among Indian Women
Source: PubMed Central journal article supplement (PMC11581580; doi:10.1001/jamanetworkopen.2024.40583), 2024-10-23
Supplement: jamanetwopen-e2440583-s002.pdf [file jamanetwopen-e2440583-s002.pdf]

## Data Sharing Statement

Ganie. Prevalence, Phenotypes, and Comorbidities of Polycystic Ovary Syndrome Among Indian Women. *JAMA Netw Open*. Published October 23, 2024.

doi:10.1001/jamanetworkopen.2024.40583

### Data

**Data available:** Yes

**Data types:** Deidentified participant data

**How to access data:** [ashraf.endo@gmail.com](mailto:ashraf.endo@gmail.com)

**When available:** With publication

### Supporting Documents

**Document types:** None

### Additional Information

**Who can access the data:** To researchers on reasonable request

**Types of analyses:** for any purpose

**Mechanisms of data availability:** with signed data access agreement

**Any additional restrictions:** NONE
